# Supplementary material for: Fracture Dislocation of the Pisiform Bone in 14-Year-Old Boy—A Case Report
Source: MDPI journal article supplement (doi:10.3390/medicina60040532), 2024-03-25
Supplement: s1 [file s1]

## Supplementary Files

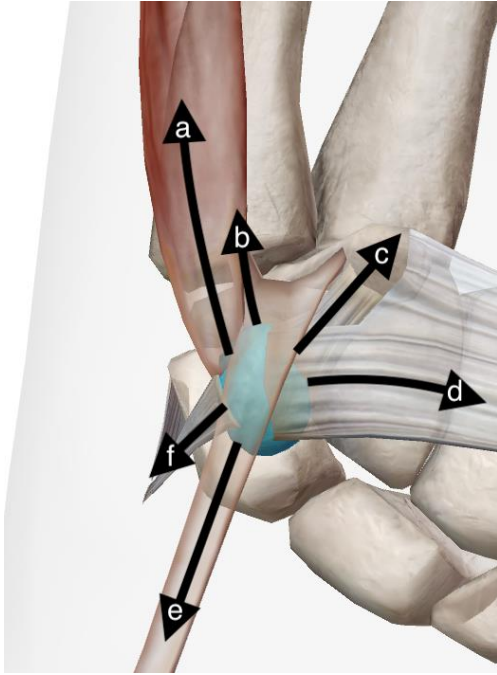

**Figure S1.** (Image courtesy of Visible Body), Right wrist: anterior view on stabilizing structures of the pisiform bone (blue) and schematic representation of their stabilizing function. a) abductor digiti minimi (ADM), b) piso-hamate ligament, c) piso-metacarpal ligament, d) transverse carpal ligament (TCL), e) flexor carpi ulnaris tendon (FCU), f) extensor retinaculum

**Table S1:** This table is showcasing documented cases of Pisiform bone injuries, encompassing dislocations, fracture dislocations, and fractures in patients up to 18 years of age.

| Author         | Year | Age | Sex | Kind of injury       | Therapy                                     | Result                                                        |
|----------------|------|-----|-----|----------------------|---------------------------------------------|---------------------------------------------------------------|
| Ashkan [6]     | 1998 | 9   | W   | Simple dislocation   | Closed reduction                            | Asymptomatic                                                  |
| Browers [15]   | 2015 | 9   | M   | Nonunion             | Partial excision                            | Asymptomatic                                                  |
| Cohen [14]     | 1922 | 11  | M   | Simple dislocation   | Closed reduction                            | Mild symptoms after 2 Weeks, than lost in follow up           |
| Giannetti [5]  | 2020 | 11  | M   | Fracture Dislocation | ORIF with K-Wire                            | Asymptomatic in 15 Months, Mayo Wrist score 95                |
| Hurni [3]      | 2015 | 11  | M   | Fracture dislocation | Closed reduction                            | Asymptomatic                                                  |
| Choong [12]    | 2023 | 15  | M   | Simple dislocation   | open reduction                              | Asymptomatic, Transient ulnar palsy resolved                  |
| Korovessis [9] | 1983 | 14  | M   | Simple dislocation   | Pisiformectomy after unsuccessful reduction | Asymptomatic                                                  |
| Kubiak [10]    | 2001 | 13  | W   | Simple dislocation   | Closed reduction                            | asymptomatic                                                  |
| Letsch [11]    | 2016 | 16  | M   | Simple dislocation   | open reduction                              | asymptomatic                                                  |
| Mancini [4]    | 2005 | 13  | M   | Fracture dislocation | Closed reduction                            | Asymptomatic                                                  |
| Mancini [4]    | 2005 | 12  | M   | Fracture dislocation | Closed reduction                            | Asymptomatic                                                  |
| McCarron [7]   | 1989 | 18  | M   | Simple dislocation   | Pisiformectomy after unsuccessful reduction | Asymptomatic                                                  |
| Prochazka      | 2024 | 14  | M   | Fracture dislocation | Pisiformectomy after unsuccessful reduction | Asymptomatic with DASH score: 2.5/100 and Mayo Wrist Score 95 |
| Pevny [22]     | 1996 | 17  | M   | Simple dislocation   | Pisiformectomy after unsuccessful reduction | Asymptomatic                                                  |
| Sharara [8]    | 1993 | 18  | M   | Simple dislocation   | Closed reduction                            | Asymptomatic                                                  |
